# Supplementary material for: Malleability of Statistical Perception: Impact of Validity Presentation on College Admission Test Policy Preferences
Source: Oxford University Press journal article supplement (doi:10.1525/collabra.24087), 2021-01-01
Supplement: collabra_2021_7_1_24087_61003.docx [file collabra_2021_7_1_24087_61003.docx]

**Supplementary Material**

The following figures represent the estimated robustness of the individual artwork networks, for each figure, the shorthand title of the artwork is indicated in the top left corner. In all cases, the left panel illustrates bootstrapped confidence intervals of estimated edge-weights and the right panel illustrates if the edges significantly differ from each other. For all analyses a nonparametric bootstrap with 2000 samples was used.

The corresponding code can be found on the OSF page: <https://osf.io/3n8zy/>

Left panel caption: Bootstrapped confidence intervals of estimated edge-weights for the estimated network. The red line indicates the sample values and the gray area the bootstrapped CIs. Each horizontal line represents one edge of the network, ordered from the edge with the highest edge-weight to the edge with the lowest edge-weight. In the case of ties (for instance, multiple edge-weights were estimated to be exactly 0), the mean of the bootstrap samples was used in ordering the edges.

Right panel caption: Bootstrapped difference tests (α = 0.05) between edgeweights that were non-zero in the estimated network. Gray boxes indicate edges that do not differ significantly from one-another and black boxes represent edges that do differ significantly from one another. Colored boxes in the edge-weight plot correspond to the color of the edge in the network.

**
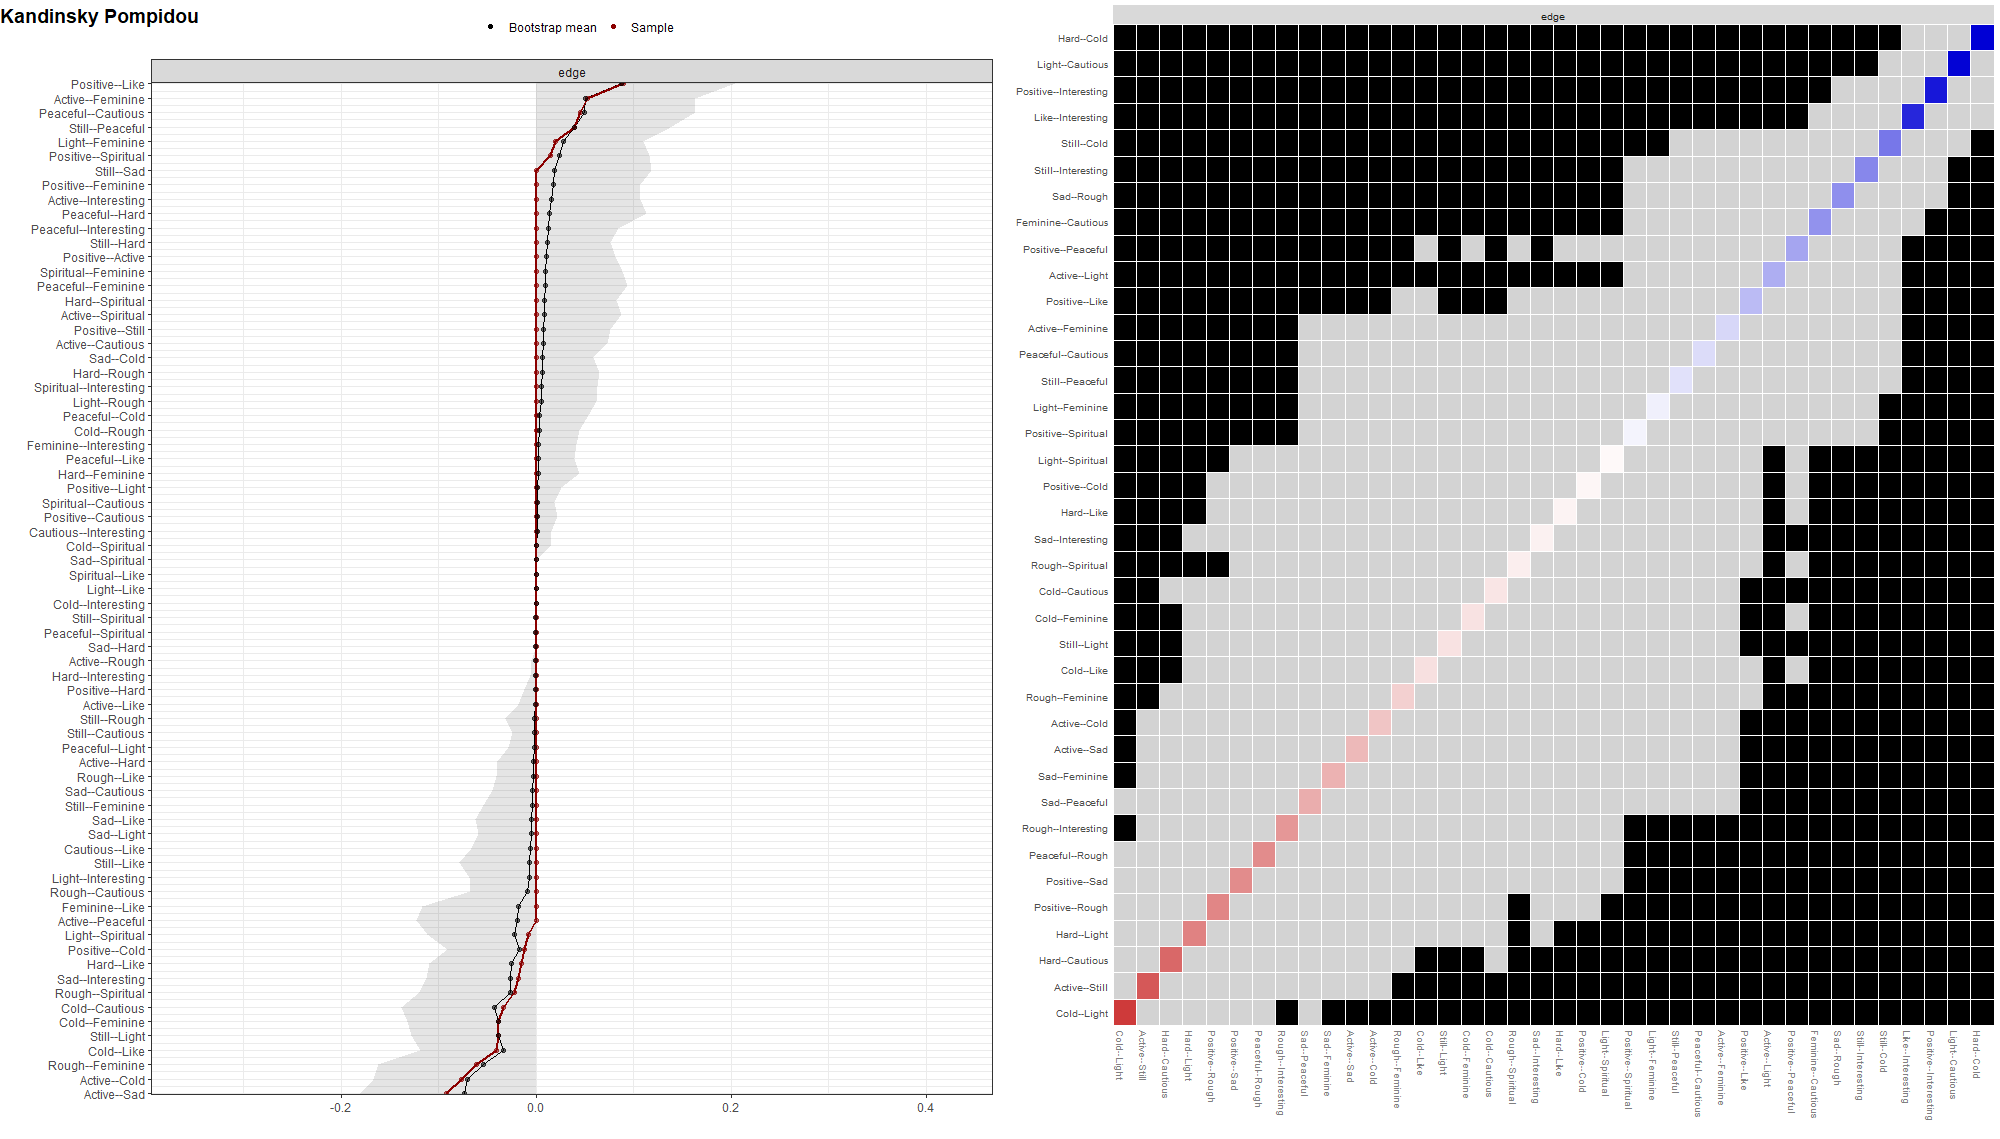
**

**
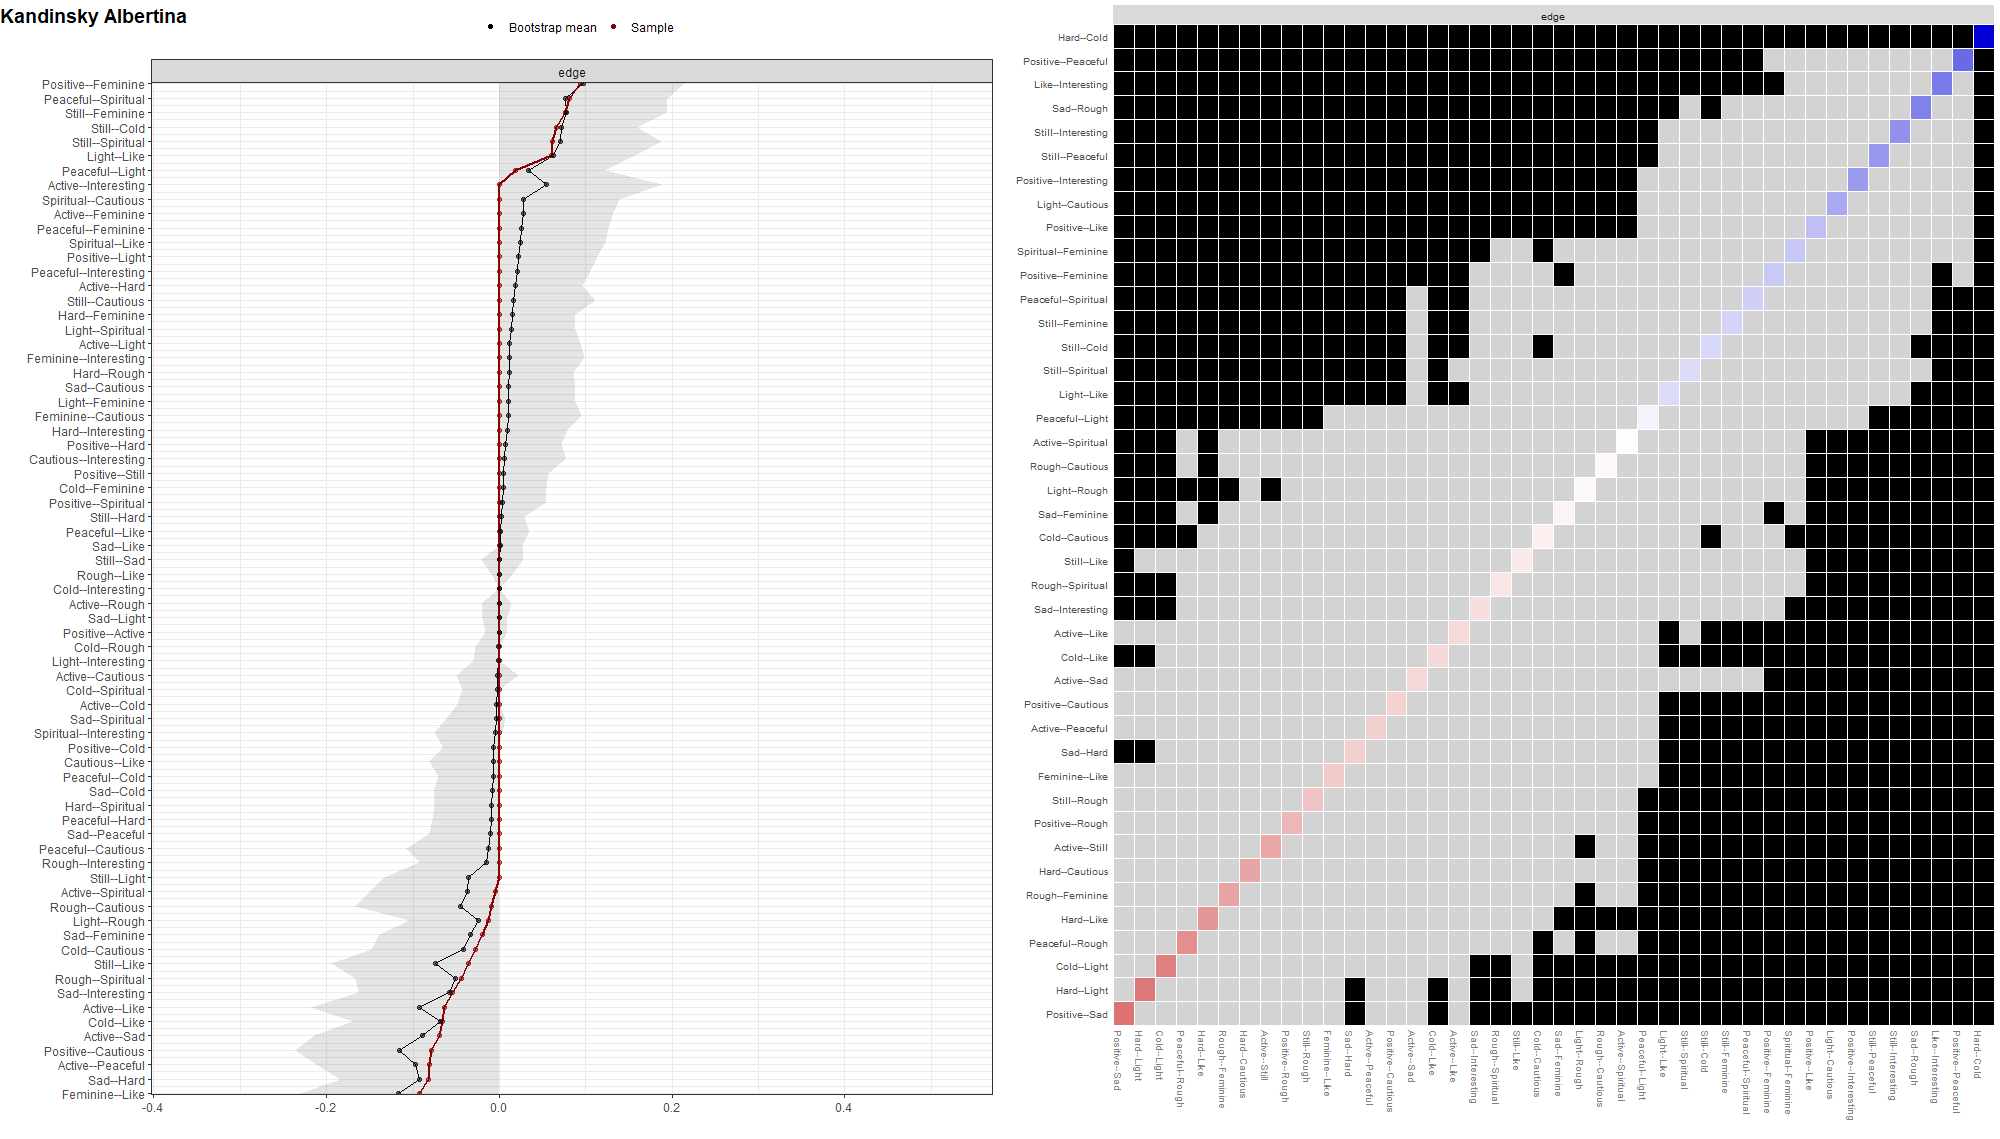
**

**
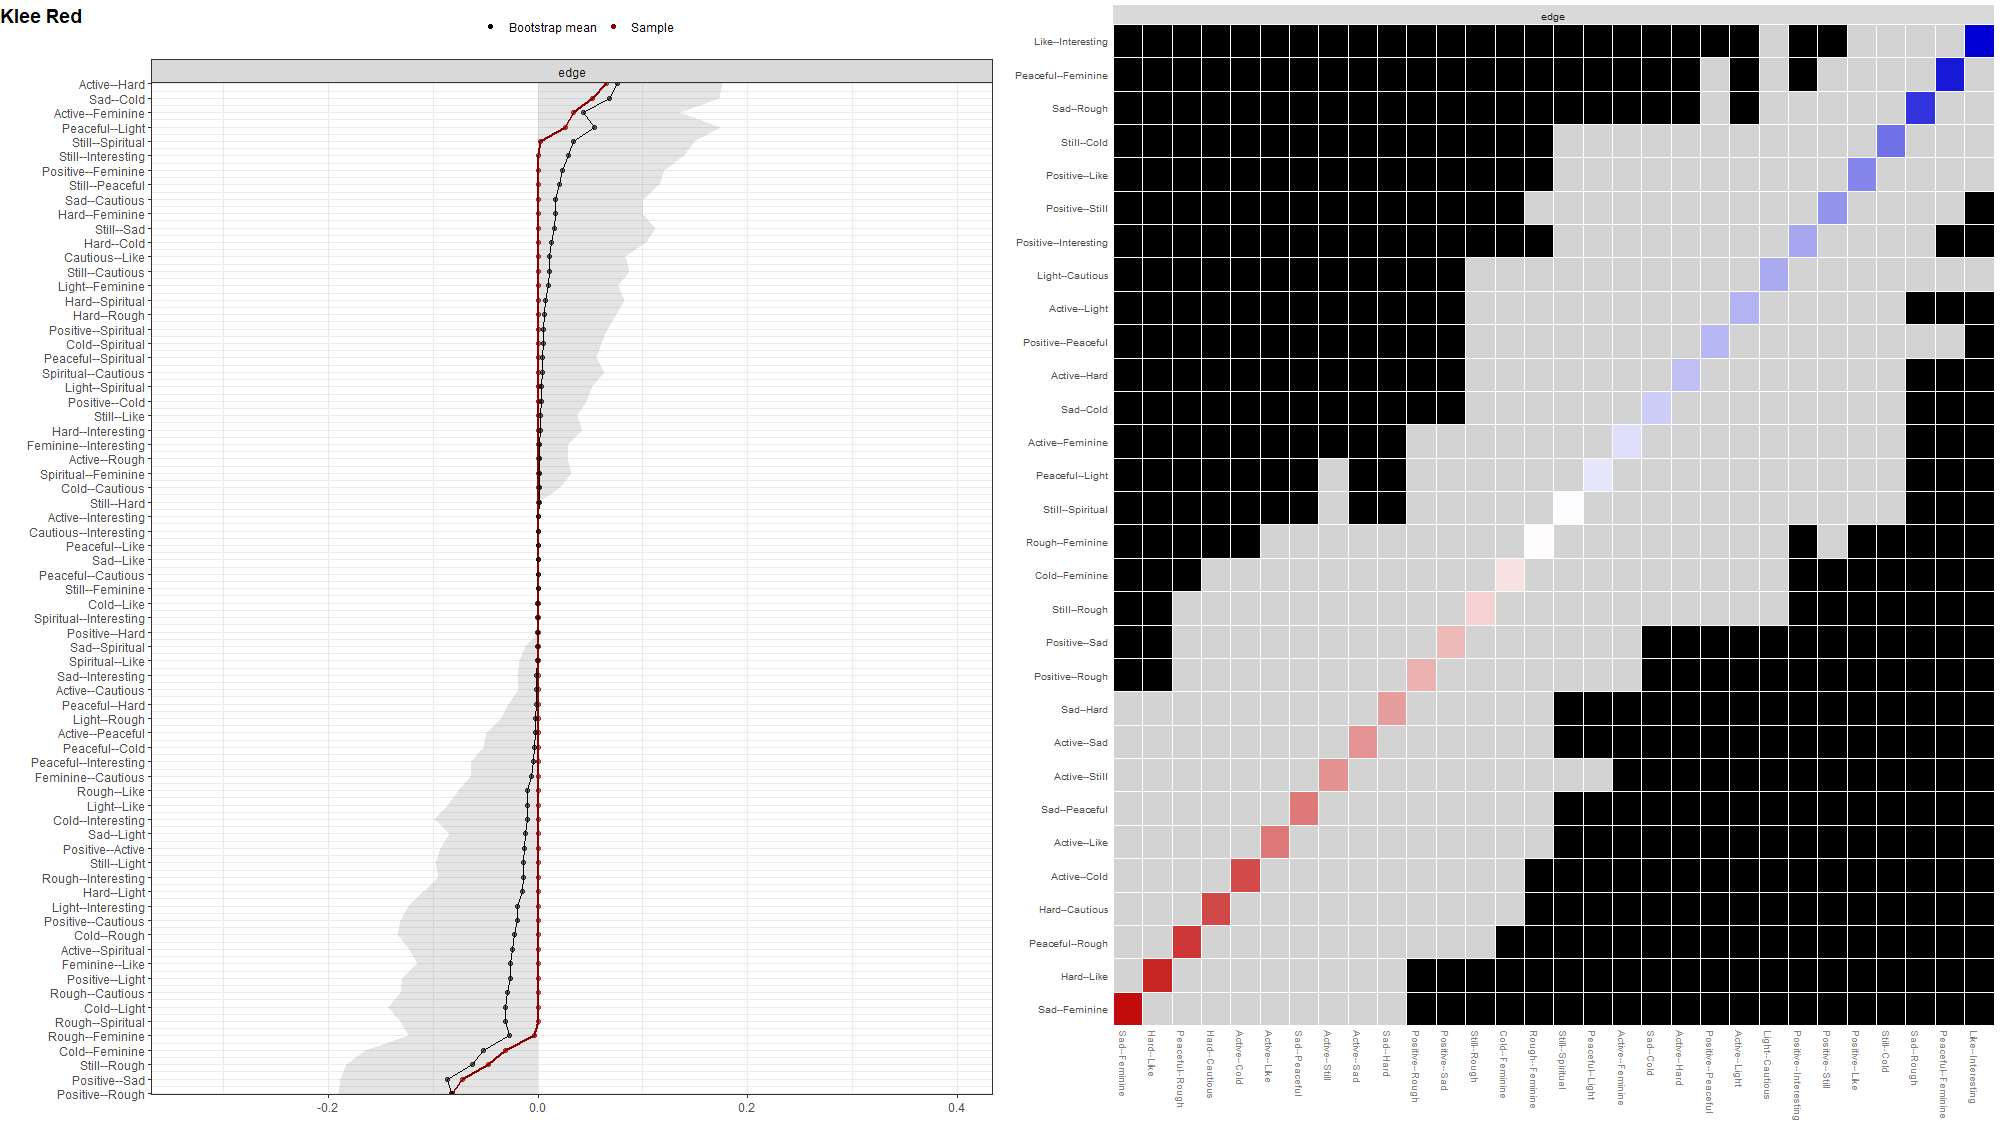
**

**
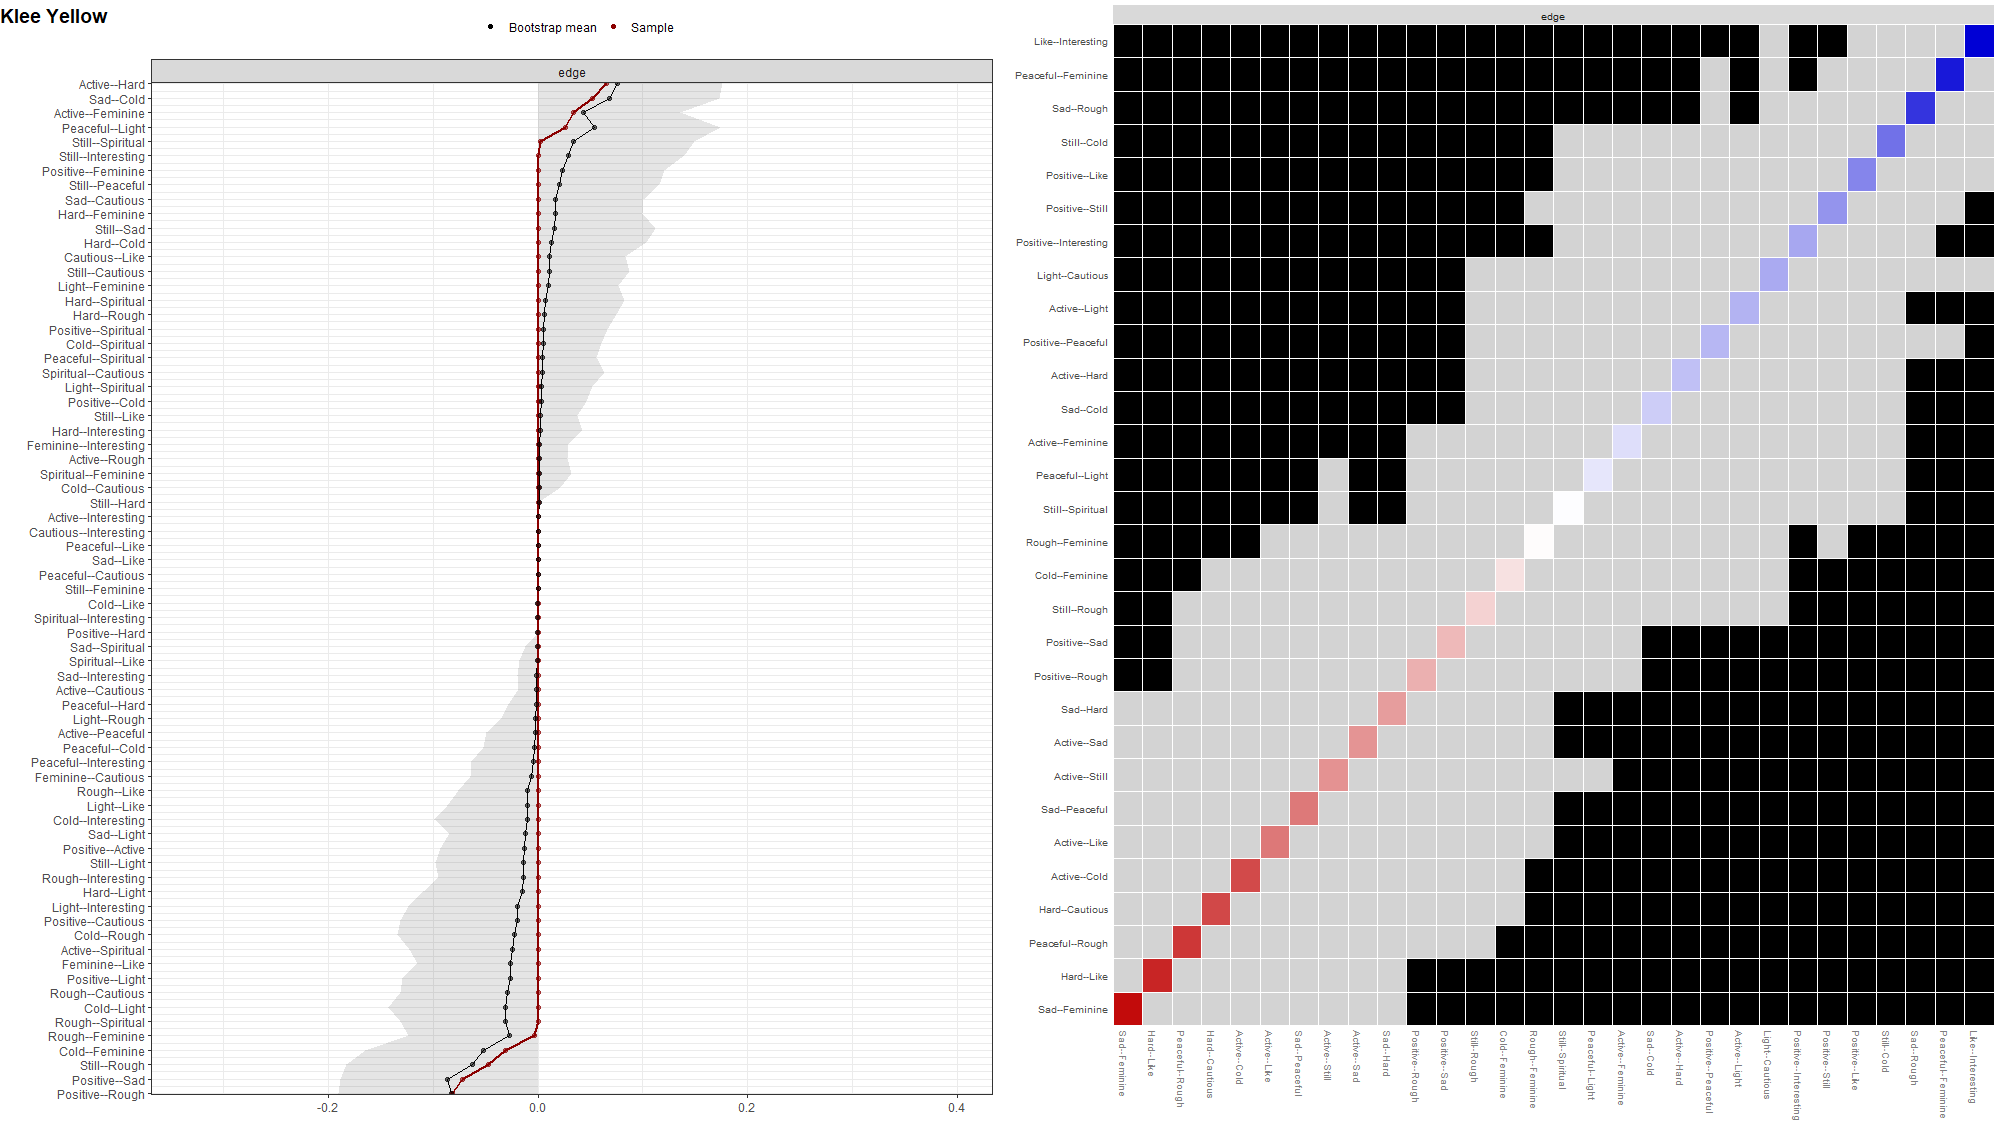
**

**
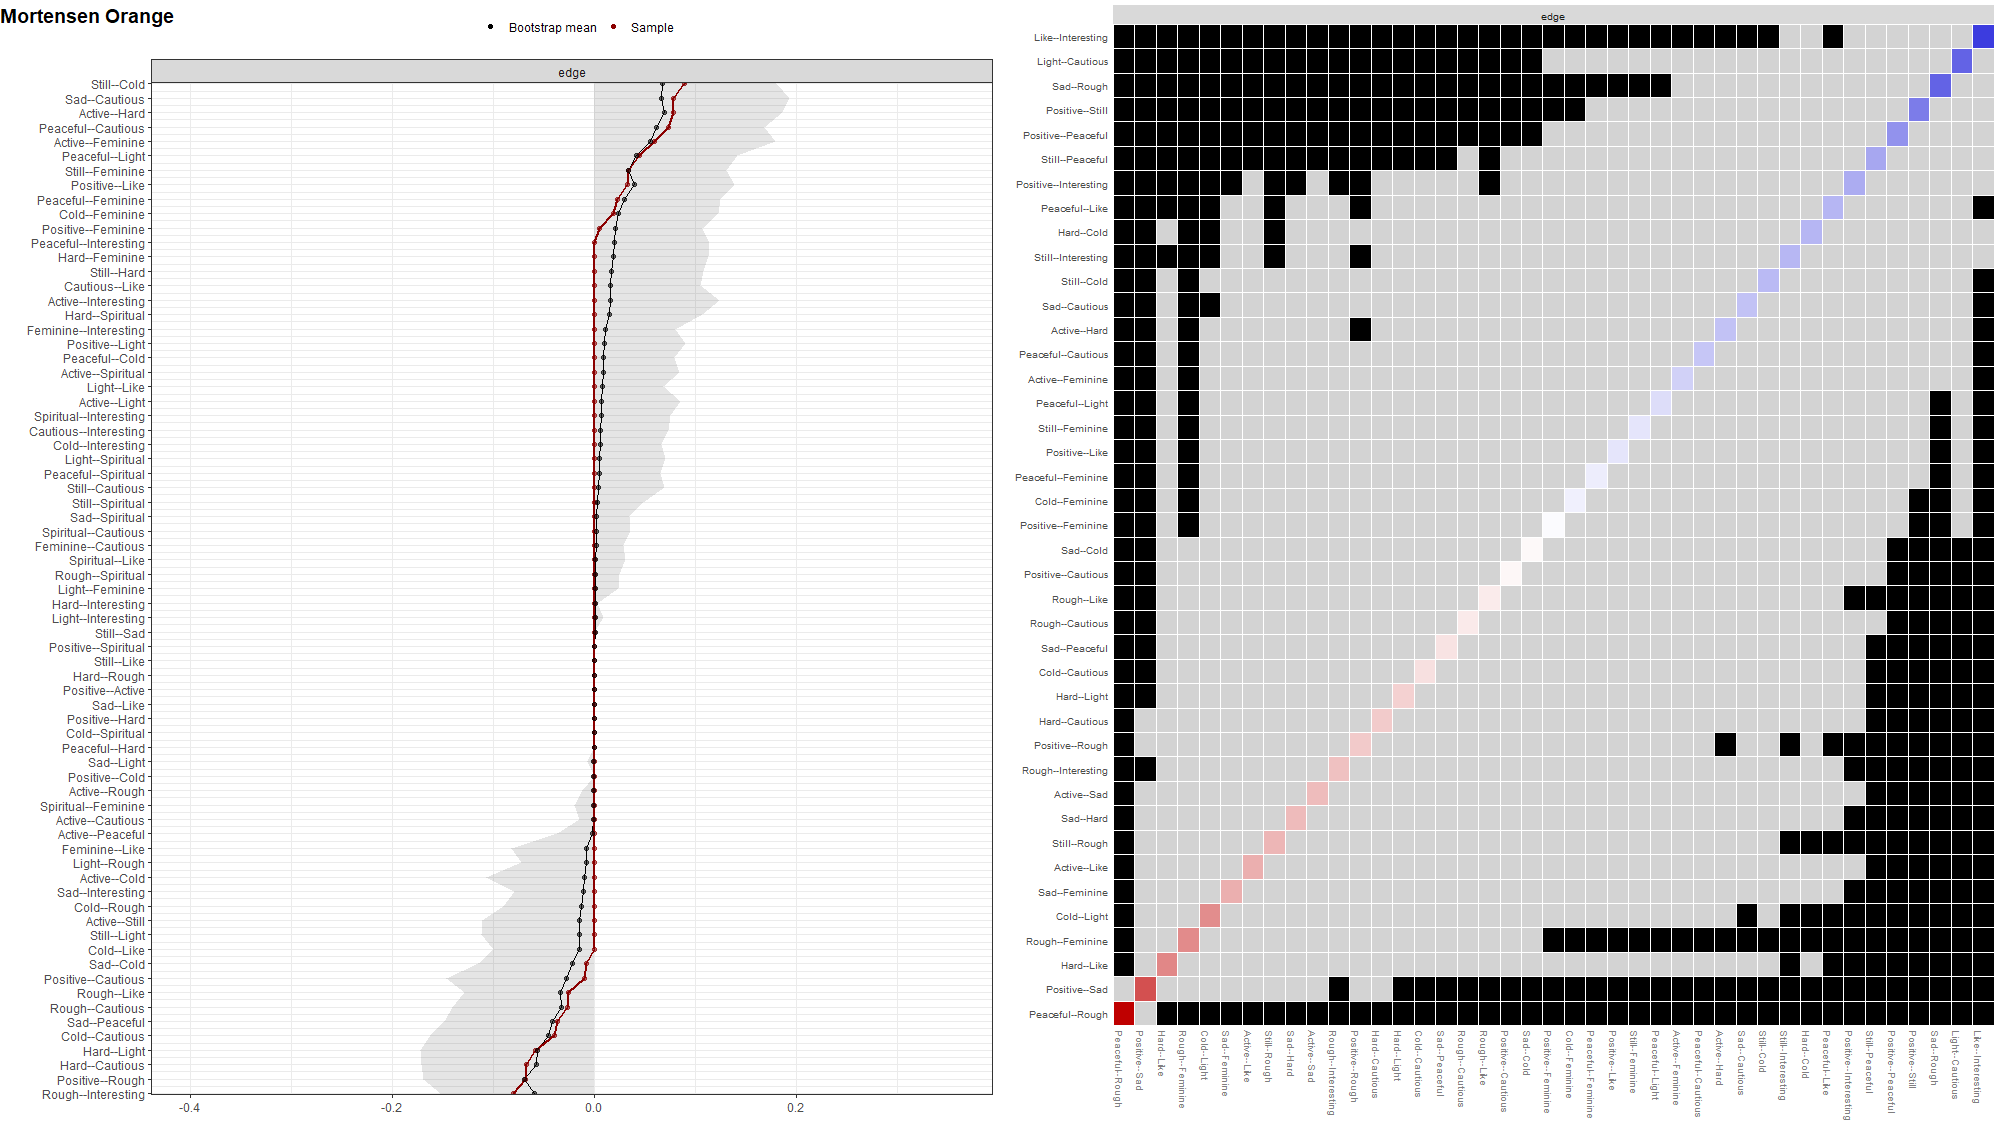
**

**
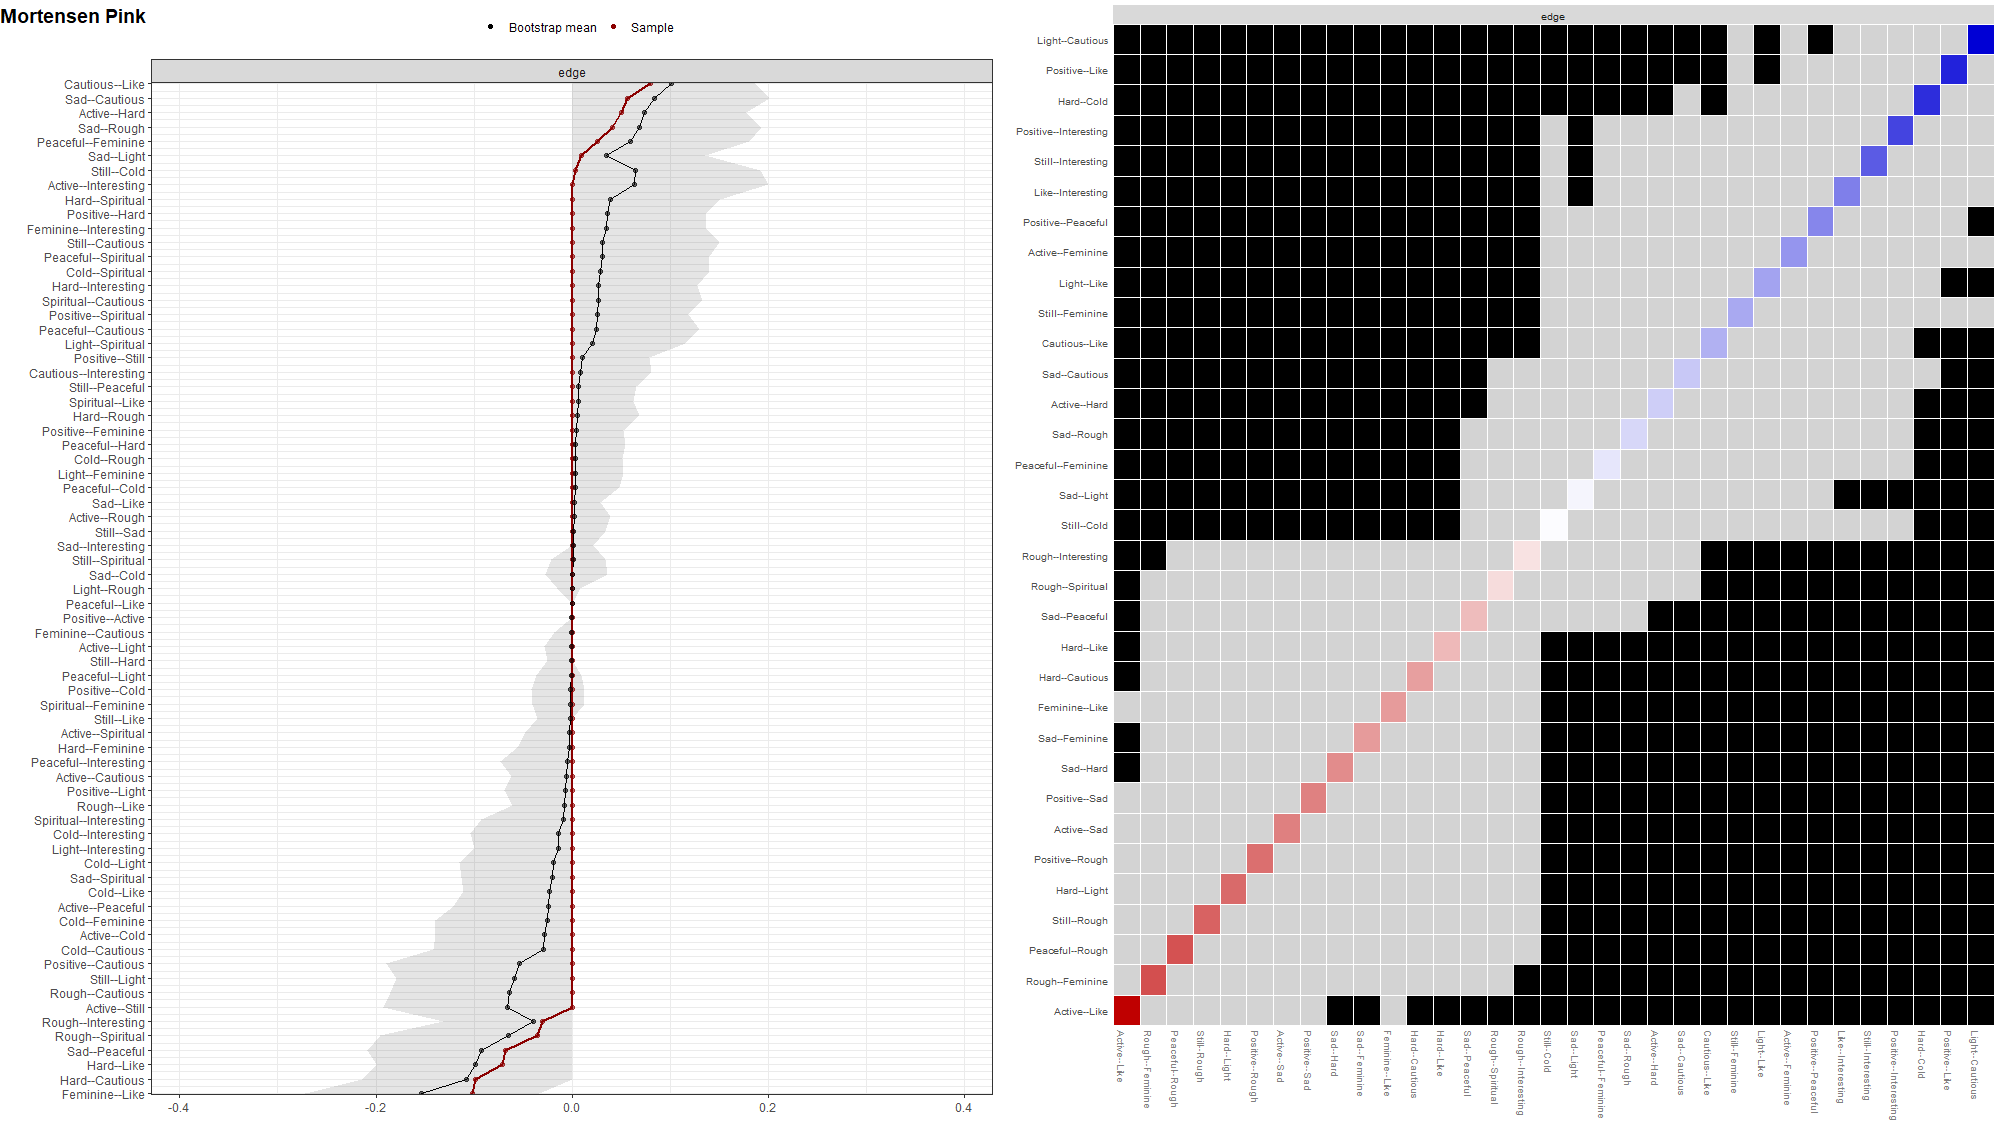
**

**
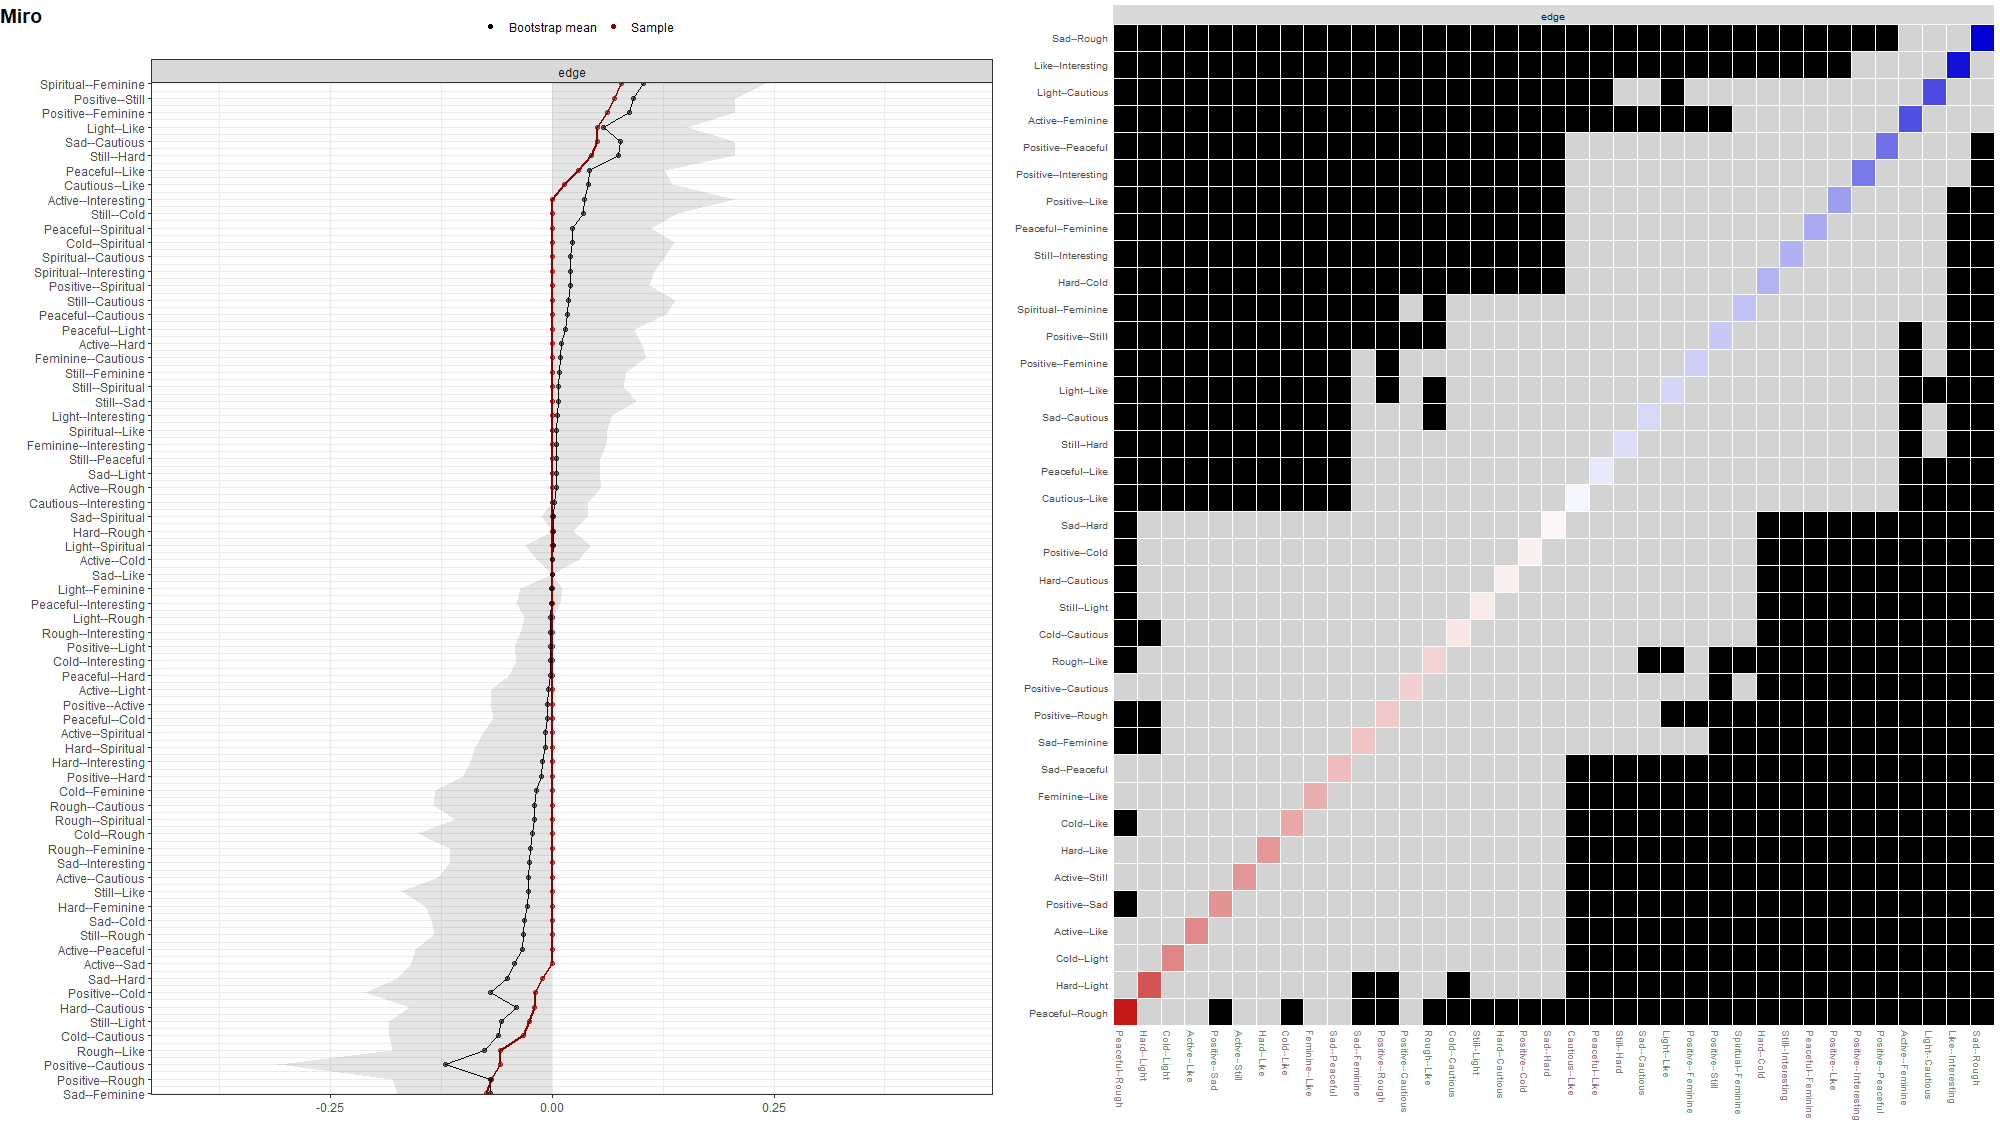
**

**
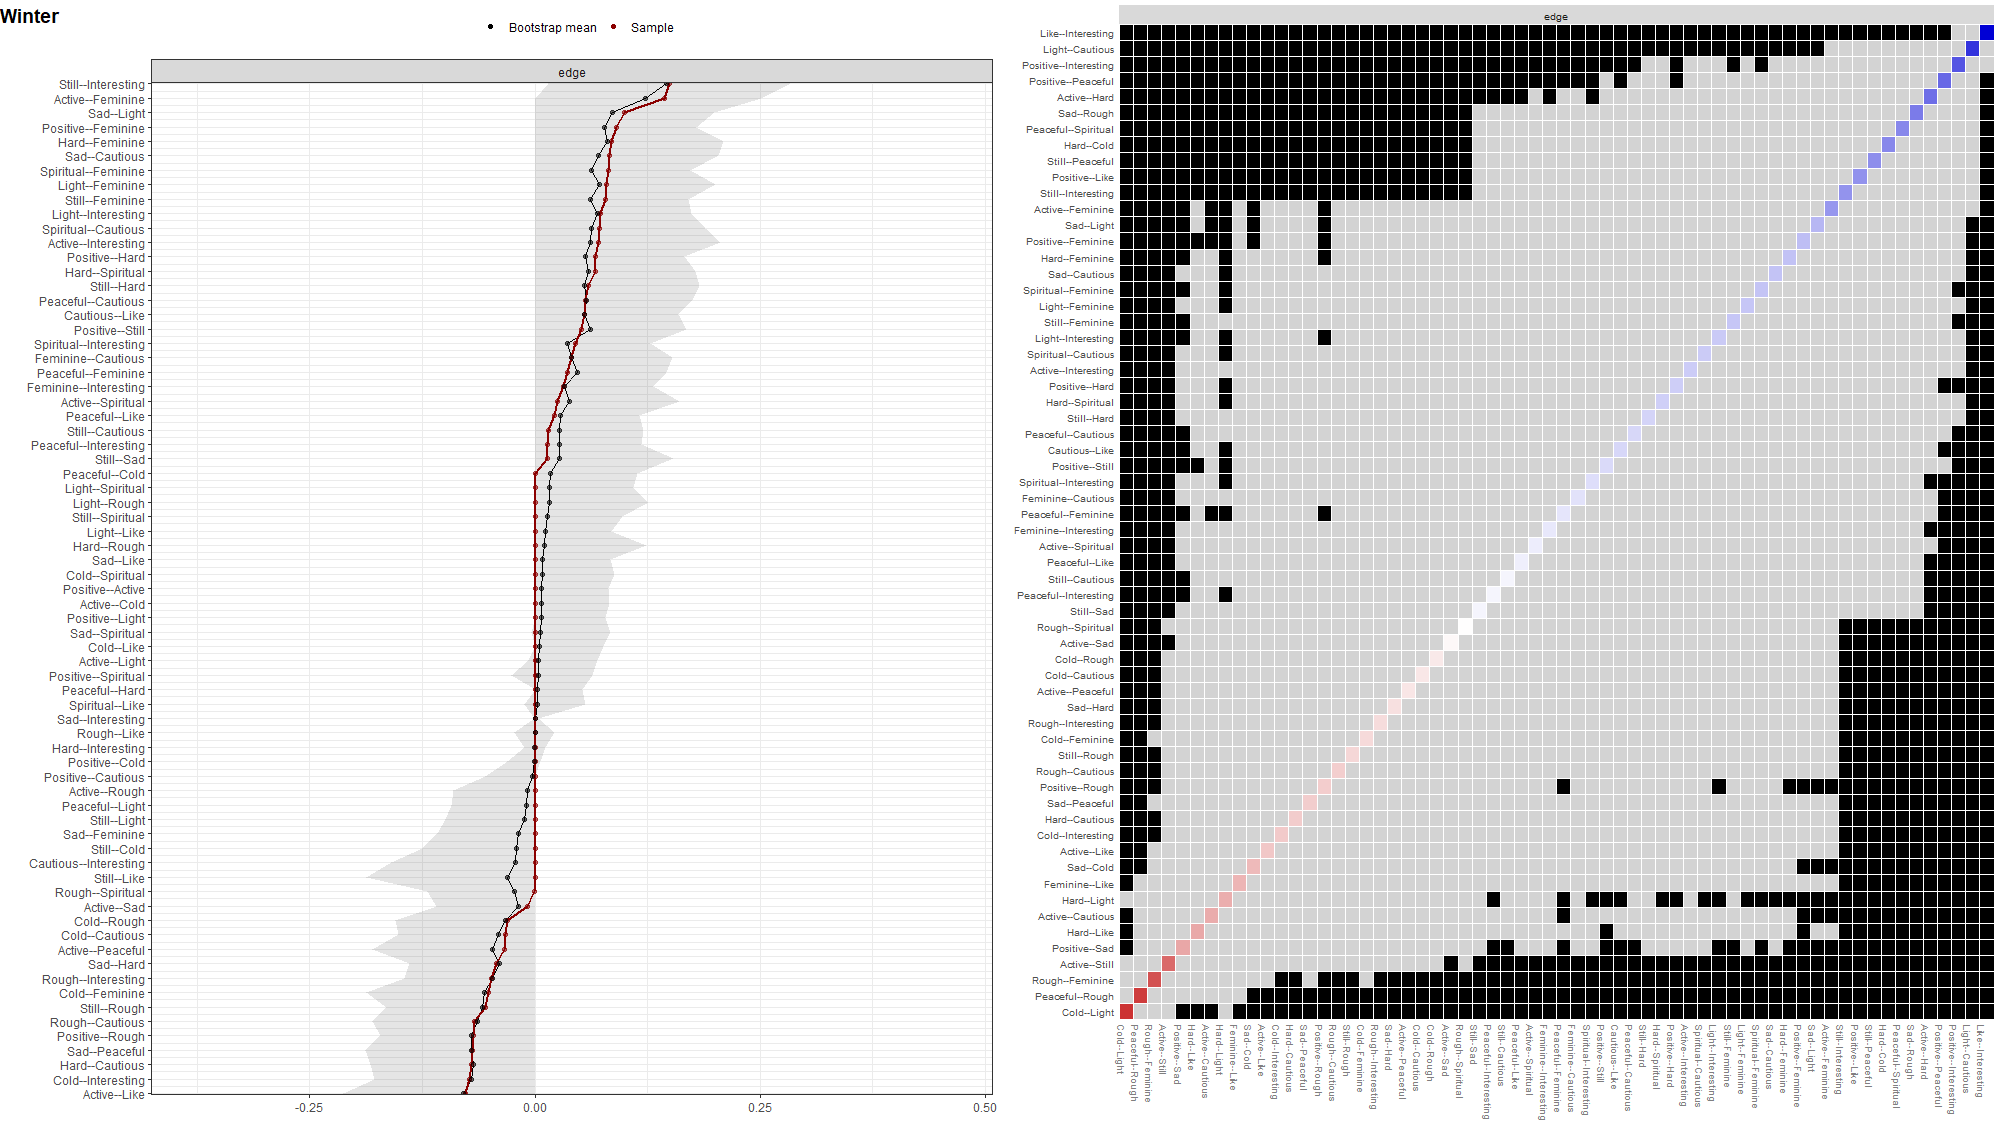
**
